# Supplementary material for: Effects of Excess Manganese on the Xylem Sap Protein Profile of Tomato (Solanum lycopersicum) as Revealed by Shotgun Proteomic Analysis
Source: MDPI journal article supplement (doi:10.3390/ijms21228863), 2020-11-23
Supplement: s1 [file s1]

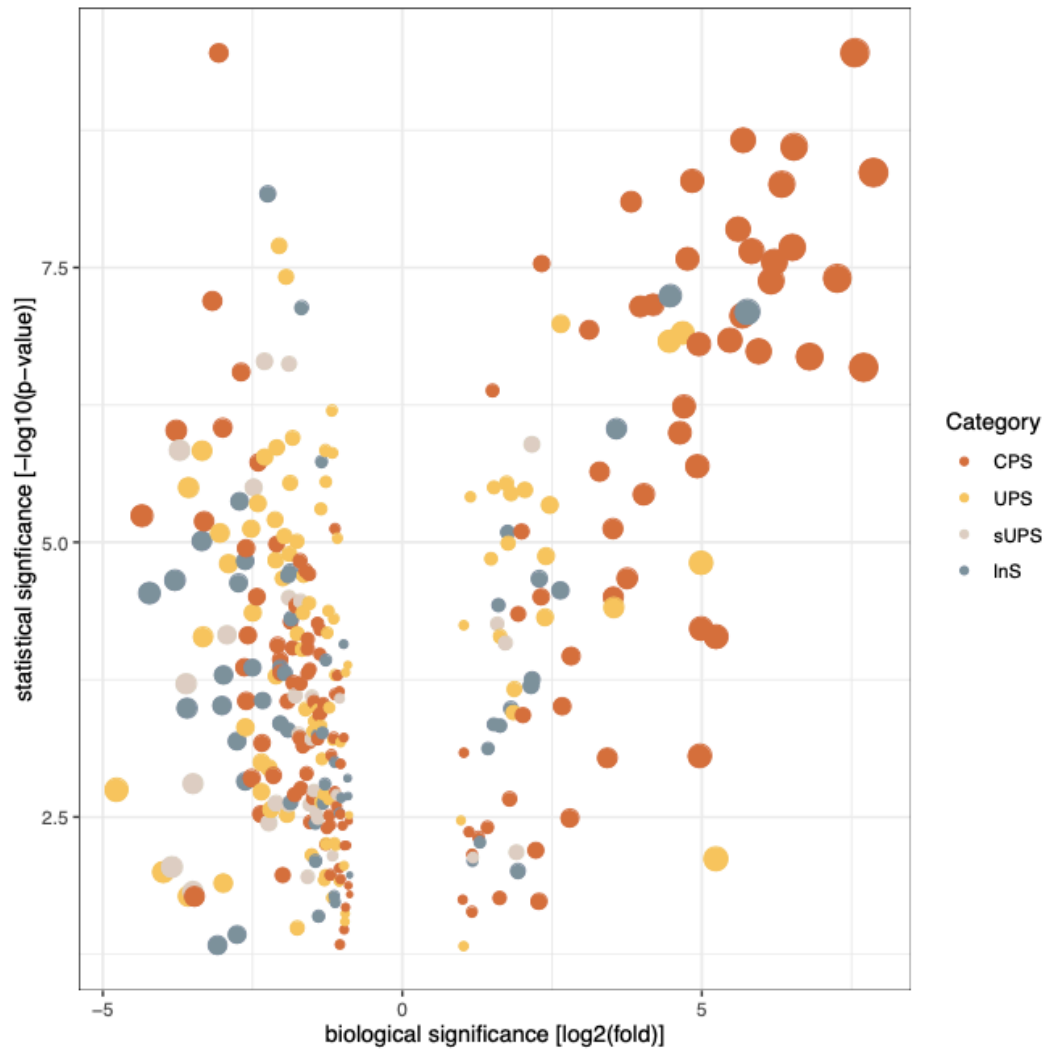

**Figure S1** Effect of excess Mn on the xylem sap protein profile using label-free shotgun proteomic analyses, showing the different protein categories. The volcano scatter plot contains the 668 identified and quantified proteins (peptides assigned to a protein and used for quantification  $\geq 2$ ). CPS: conventional secretory pathway; UPS: unconventional secretory pathway; sUPS: suggested unconventional secretory pathway; InS: likely non-secretory.

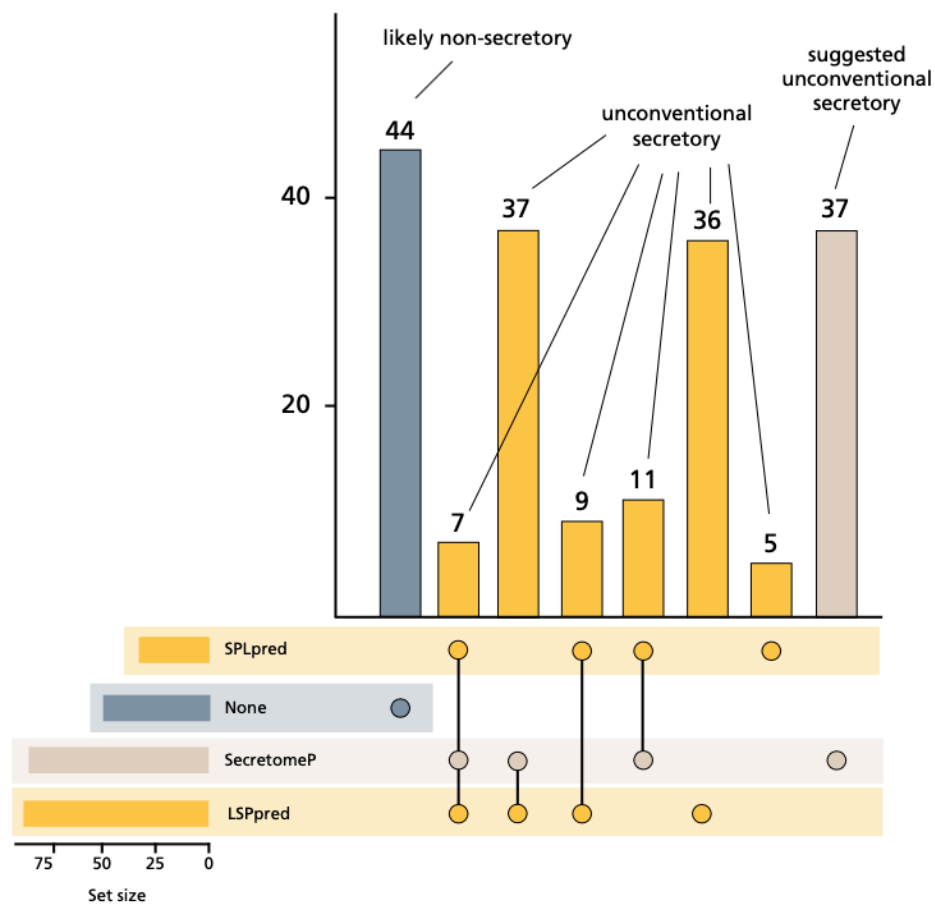

**Figure S2** UpSet plot showing the number of proteins lacking a signal peptide, but predicted to be secretory by the three different prediction tools used in the study. Those predicted to be secretory by LSPpred and/or SPLpred were considered 'unconventional secretory'; those predicted to be secretory by Secretome P only were considered 'suggested unconventional secretory', and those not considered to be secretory by any tool were considered 'likely non-secretory'.
